# Supplementary material
Source: publisher figshare collection journal article supplement (https://frontiersin.figshare.com/ndownloader/files/20188749)
Supplement: Supplementary file 1 [file 20188749]

**
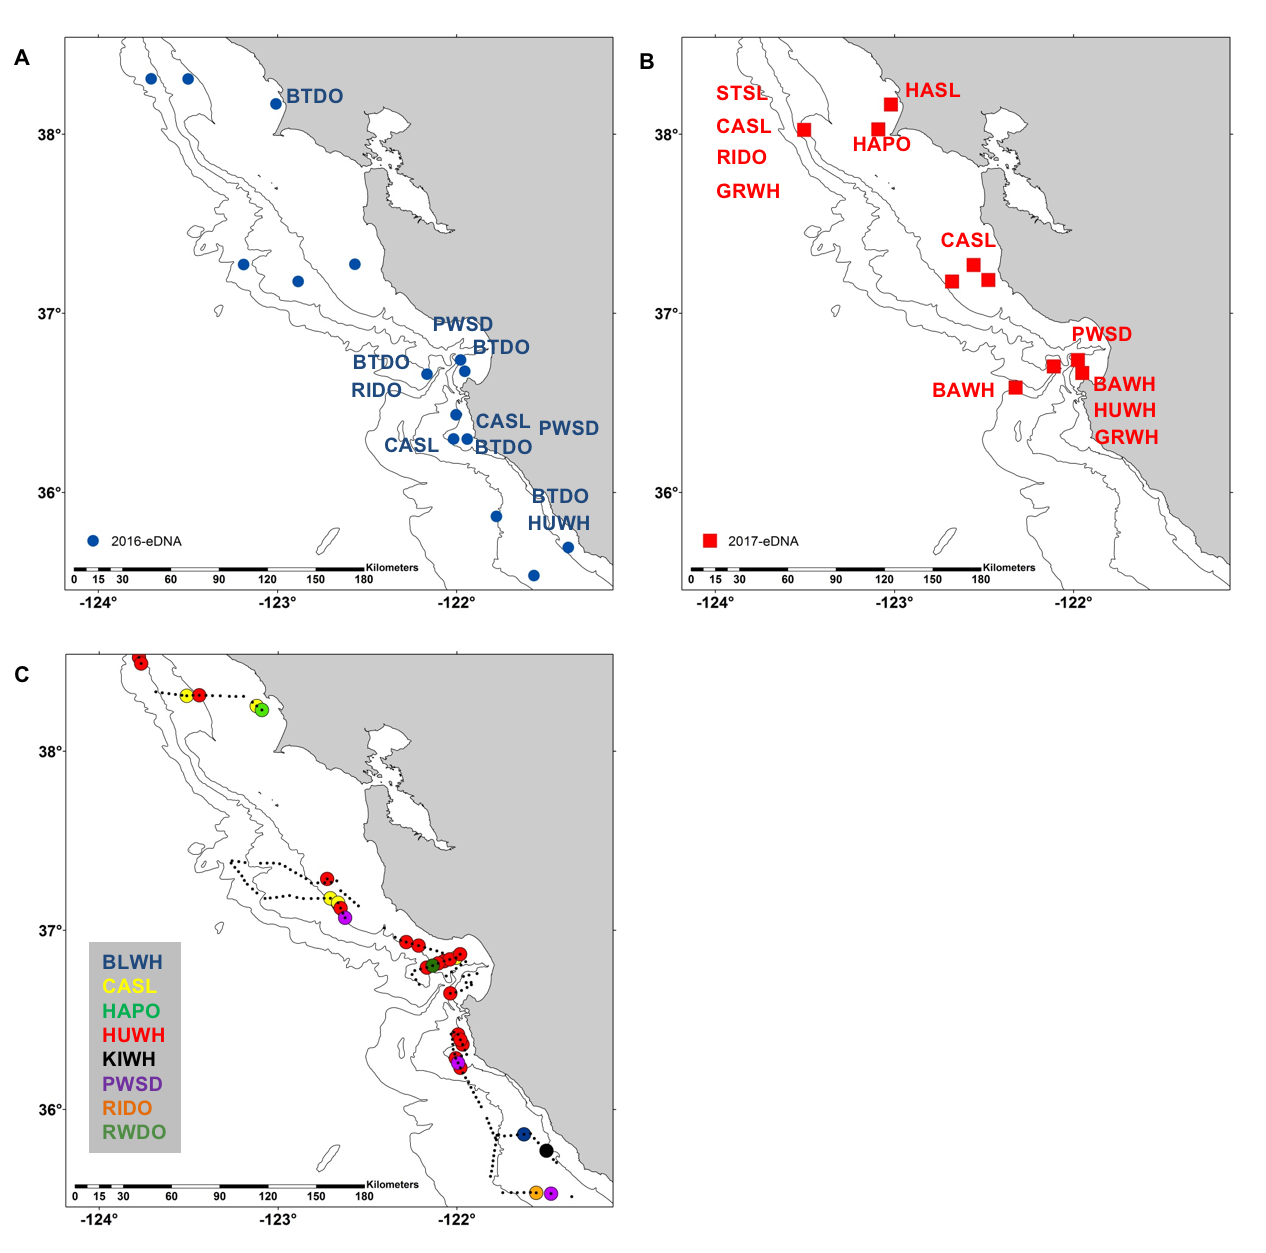
**

**Supplementary Figure S2.** Stations where eDNA was collected during (**A**) 2016 (blue dots) and (**B**) 2017 (red squares). Marine mammals that were identified by eDNA are listed next to stations with code name for each taxon (code key below). (**C**) Marine mammals observed by visual survey (presence only; per 3 km interval) during the study’s time period of the 2016 RREAS. Small black dots represent cruise trackline and large dots are sighting locations of mammal genera observed; colored by taxa. Alpha Codes: baleen whale (BAWH), blue whale (BLWH), bottlenose dolphin (BTDO), California sea lion (CASL), grey whale (GRWH), harbor porpoise (HAPO), harbor seal (HASL), humpback whale (HUWH), Pacific white-sided dolphin (PWSD), Risso’s dolphin (RIDO), northern right whale dolphin (RWDO), killer whale (KIWH), and Steller sea lion (STSL). Contours are 200, 1000 and 2000 m isobaths.
